# Supplementary material for: Dogs and humans respond to emotionally competent stimuli by producing different facial actions
Source: PubMed Central journal article supplement (PMC5686192; doi:10.1038/s41598-017-15091-4), 2017-11-14
Supplement: 41598_2017_15091_MOESM1_ESM.pdf [file 41598_2017_15091_MOESM1_ESM.pdf]

## **Electronic supplementary material:**

### **Article title:**

Dogs and humans respond to emotionally competent stimuli by producing different facial actions

### **Authors:**

Caeiro, Cátia<sup>1,2\*</sup>; Guo, Kun<sup>1</sup>; Mills, Daniel<sup>2</sup>

<sup>1</sup>School of Psychology, University of Lincoln, UK.

<sup>2</sup>School of Life Sciences, University of Lincoln, UK.

### **\*Corresponding author:**

Cátia C. Caeiro, ccorreaicaeiro@lincoln.ac.uk

**S1:** The sex and race of the humans coded in the videos were distributed as follows: 25 females and 25 males; 46 Caucasians, 2 Africans, 2 Orientals. The sex and breed of the dogs coded in the videos were distributed as follows: 37 females, 55 males and 8 unknown sex; 34 mixed or unknown breeds, 6 Siberian Huskies, 5 Beagles, 5 Golden Retrievers, 4 Boxers, 3 Alaskan Malamutes, 3 Chihuahuas, 3 Labrador Retrievers, 3 Pitbulls, 2 Cavalier King Charles Spaniels, 2 Cocker Spaniels, 2 French Bulldogs, 2 Dobermans, 2 Greyhounds, 2 Shiba inus, 2 Staffordshire Terriers, 1 American Eskimo Dog, 1 Australian Cattle Dog, 1 Bernese Mountain Dog, 1 Boston Terrier, 1 Catahoula Leopard Dog, 1 Dutch Shepherd, 1 German Shepherd, 1 Great Dane, 1 Jack Russel Terrier, 1 Pekingese, 1 Pomeranian, 1 Poodle, 1 Pudelpointer, 1 Rottweiler, 1 Samoyedo, 1 Shetland Sheepdog, 1 Vizsla, 1 Weimaraner, 1 Whippet, 1 Yorkshire Terrier. Due to the nature of the videos, age could not be identified, but young children and older adults (estimated age below 16 and above 65 years old) were excluded in order to make the FACS coding more reliable as the age-related facial characteristics of very young children or older adults may impact FACS coding (e.g. wrinkles might be wrongly coded as appearance changes). For the same reasons, we excluded dogs that were either reported by the owners as puppies or that still presented puppy-like facial morphology.

**Table S2:** Code and description of the facial actions identified in humans<sup>1</sup> and dogs<sup>2</sup> that were entered in the analysis.

| Action Units                                |                         |
|---------------------------------------------|-------------------------|
| Humans                                      | Dogs                    |
| 1 Inner brow raiser                         | 101 Inner brow raiser   |
| 2 Outer brow raiser                         | x                       |
| 4 Brow lowerer                              | x                       |
| 5 Upper lid raiser                          | x                       |
| 6 Cheek raiser                              | x                       |
| 7 Lid tightener                             | x                       |
| 43 Eye closure                              | 143 Eye closure         |
| 45 Blink                                    | 145 Blink               |
| 10 Upper lip raiser                         | 110 Upper lip raiser    |
| 12 Lip corner puller                        | 12 Lip corner puller    |
| 14 Dimpler                                  | x                       |
| 15 Lip corner depressor                     | x                       |
| 16 Lower lip depressor                      | 116 Lower lip depressor |
| 17 Chin raiser                              | x                       |
| 18 Lip pucker                               | 118 Lip pucker          |
| 20 Lip stretcher                            | x                       |
| 23 Lip tightener                            | x                       |
| 24 Lip presser                              | x                       |
| 25 Lips part                                | 25 Lips part            |
| 26 Jaw drop                                 | 26 Jaw drop             |
| 27 Mouth stretch                            | 27 Mouth stretch        |
| 38 Nostril dilator<br>39 Nostril compressor | x                       |

| Action Descriptors |                  |
|--------------------|------------------|
| Humans             | Dogs             |
| 19 Tongue show     | 19 Tongue show   |
| 28 Lips suck       | x                |
| 33 Blow            | x                |
| 37 Lip wipe        | 37 Lip wipe      |
| x                  | 137 Nose lick    |
| x                  | 126 Panting      |
| 40 Sniff           | 40 Sniff         |
| 50 Vocalizations   | 50 Vocalizations |
| 84 Head shake      | x                |

| Ear Action Descriptors |                       |
|------------------------|-----------------------|
| Humans                 | Dogs                  |
| x                      | EAD101 Ears forward   |
| x                      | EAD102 Ears adductor  |
| x                      | EAD103 Ears flattener |
| x                      | EAD104 Ears rotator   |
| x                      | EAD105 Ears downwards |

**Table S3:** Common facial movements across contexts, significantly different than relaxed context, but present in more than one context.

| Contexts              | Humans |            |                  |                | Dogs   |            |
|-----------------------|--------|------------|------------------|----------------|--------|------------|
|                       | Rate   | Proportion | Previous studies | Source         | Rate   | Proportion |
| Fear                  | AU1    | AU1        | AU1              | <sup>3</sup>   | AU12   | AU12       |
|                       | AU2    | AU2        | AU2              |                | AU16   | AU16       |
|                       | AU4    | AU4        | AU4              |                | AD19   | AU25       |
|                       | AU10   | AU10       | AU25             |                | AU25   | AU26       |
|                       | AU12   | AU12       | AU26             |                | AU26   | AU43       |
|                       | AU16   | AU16       | AU27             |                | AU43   |            |
|                       | AU25   | AU25       |                  |                |        |            |
|                       | AU26   | AU27       |                  |                |        |            |
|                       | AU27   | AD50       |                  |                |        |            |
| AD50                  |        |            |                  |                |        |            |
| Frustration           | AU1    | AU1        | AU1              | <sup>4-6</sup> | AD19   | AU43       |
|                       | AU2    | AU2        | AU2              |                | AD50   | AU25       |
|                       | AU4    | AU4        | AU4              |                | AU16   | AU26       |
|                       | AU10   |            |                  |                | AU25   |            |
|                       | AU25   |            |                  |                | AU26   |            |
|                       | AU26   |            |                  |                | AU43   |            |
|                       | AD50   |            |                  |                | EAD104 |            |
|                       |        |            |                  | EAD105         |        |            |
| Positive Anticipation | AU1    | AU1        | AU12             | <sup>7</sup>   | AU10   | AU16       |
|                       | AU2    | AU2        |                  |                | AU16   | AU25       |
|                       | AU10   | AU10       |                  |                | AU25   | AU26       |
|                       | AU12   | AU12       |                  |                | AU26   | AU43       |
|                       | AD50   | AD50       |                  |                | AD19   |            |
|                       |        |            |                  |                | AU43   |            |
|                       |        |            |                  |                | AD50   |            |
|                       |        |            |                  |                | EAD103 |            |
|                       |        |            |                  |                | EAD104 |            |
|                       |        |            |                  | EAD105         |        |            |
| Happiness             | AU10   | AU10       | AU12             | <sup>3</sup>   | AU10   | AU12       |
|                       | AU12   | AU12       |                  |                | AU12   | AU16       |
|                       | AU16   | AU16       |                  |                | AU16   | AU25       |
|                       | AU25   | AU25       |                  |                | AU25   | AU26       |
|                       | AU26   | AU27       |                  |                | AU26   |            |
|                       | AU27   |            |                  |                | AD19   |            |
|                       |        |            |                  |                | EAD103 |            |
|                       |        |            |                  |                | EAD104 |            |
|                       |        |            |                  |                | EAD105 |            |

**Table S4:** Effect sizes ( $\eta^2$ ) for Kruskal-Wallis post-hoc tests from first hypothesis and for Mann-Whitney tests from second hypothesis.

| Dog Facial Actions | Emotion contrasts                | $\eta^2$ | Effect size  |
|--------------------|----------------------------------|----------|--------------|
| AD19               | Relaxation-fear                  | 0.189    | large        |
| AU12               | Relaxation-fear                  | 0.106    | intermediate |
| AU16               | Relaxation-fear                  | 0.125    | intermediate |
| AU25               | Relaxation-fear                  | 0.109    | intermediate |
| AU26               | Relaxation-fear                  | 0.109    | intermediate |
| AU43               | Relaxation-fear                  | 0.121    | intermediate |
| AD126              | Relaxation-fear                  | 0.136    | intermediate |
| AD19               | Relaxation-positive anticipation | 0.123    | intermediate |
| AD37               | Relaxation-positive anticipation | 0.120    | intermediate |
| AD50               | Relaxation-positive anticipation | 0.148    | large        |
| AU10               | Relaxation-positive anticipation | 0.085    | intermediate |
| AU16               | Relaxation-positive anticipation | 0.200    | large        |
| AU25               | Relaxation-positive anticipation | 0.246    | large        |
| AU26               | Relaxation-positive anticipation | 0.237    | large        |
| AU43               | Relaxation-positive anticipation | 0.121    | intermediate |
| EAD102             | Relaxation-positive anticipation | 0.086    | intermediate |
| EAD103             | Relaxation-positive anticipation | 0.079    | intermediate |
| EAD104             | Relaxation-positive anticipation | 0.081    | intermediate |
| EAD105             | Relaxation-positive anticipation | 0.087    | intermediate |
| AD137              | Relaxation-positive anticipation | 0.125    | intermediate |
| AD19               | Relaxation-happiness             | 0.121    | intermediate |
| AU10               | Relaxation-happiness             | 0.120    | intermediate |
| AU12               | Relaxation-happiness             | 0.300    | large        |
| AU16               | Relaxation-happiness             | 0.184    | large        |
| AU25               | Relaxation-happiness             | 0.354    | large        |
| AU26               | Relaxation-happiness             | 0.319    | large        |
| AU27               | Relaxation-happiness             | 0.137    | intermediate |
| EAD103             | Relaxation-happiness             | 0.093    | intermediate |
| EAD104             | Relaxation-happiness             | 0.099    | intermediate |
| EAD105             | Relaxation-happiness             | 0.100    | intermediate |
| AD19               | Relaxation-frustration           | 0.082    | intermediate |
| AD50               | Relaxation-frustration           | 0.282    | large        |
| AU16               | Relaxation-frustration           | 0.086    | intermediate |
| AU25               | Relaxation-frustration           | 0.199    | large        |
| AU26               | Relaxation-frustration           | 0.177    | large        |
| AU43               | Relaxation-frustration           | 0.121    | intermediate |
| EAD104             | Relaxation-frustration           | 0.182    | large        |
| EAD105             | Relaxation-frustration           | 0.215    | large        |

| Emotions              | Human-dog facial action comparison | $\eta^2$ | Effect size  |
|-----------------------|------------------------------------|----------|--------------|
| Fear                  | AD19                               | 0.071    | intermediate |
| Fear                  | AD50                               | 0.143    | large        |
| Fear                  | AU10                               | 0.102    | intermediate |
| Fear                  | AU16                               | 0.077    | intermediate |
| Fear                  | AU27                               | 0.120    | intermediate |
| Fear                  | AU43                               | 0.114    | intermediate |
| Positive anticipation | AD19                               | 0.111    | intermediate |
| Positive anticipation | AD37                               | 0.078    | intermediate |
| Positive anticipation | AU10                               | 0.090    | intermediate |
| Positive anticipation | AU18                               | 0.057    | small        |
| Happiness             | AD19                               | 0.084    | intermediate |
| Happiness             | AU10                               | 0.138    | intermediate |
| Happiness             | AU12                               | 0.042    | small        |
| Frustration           | AU10                               | 0.062    | intermediate |
| Frustration           | AU45                               | 0.086    | intermediate |
| Frustration           | AU43                               | 0.142    | large        |
| Relaxation            | AU1                                | 0.099    | intermediate |

1. Ekman, P., Friesen, W. & Hager, J. *Facial action coding system (FACS): manual*. (Research Nexus, 2002).
2. Waller, B. M. *et al.* Paedomorphic Facial Expressions Give Dogs a Selective Advantage. *PLOS ONE* **8**, e82686 (2013).
3. Ekman, P., Irwin, W. & Rosenberg, E. *The emotional facial action coding system (EMFACS)*. (1994).
4. D’Mello, S. K., Craig, S. D. & Graesser, A. C. Multimethod assessment of affective experience and expression during deep learning. *Int. J. Learn. Technol.* **4**, 165–187 (2009).
5. Grafsgaard, J. F., Wiggins, J. B., Boyer, K. E., Wiebe, E. N. & Lester, J. C. Automatically Recognizing Facial Indicators of Frustration: A Learning-centric Analysis. in 159–165 (IEEE, 2013).  
doi:10.1109/ACII.2013.33
6. Waller, B. M., Misch, A., Whitehouse, J. & Herrmann, E. Children, but not chimpanzees, have facial correlates of determination. *Biol. Lett.* **10**, 20130974–20130974 (2014).
7. Gubar, G. Recognition of human facial expressions judged live in a laboratory setting. *J. Pers. Soc. Psychol.* **4**, 108–111 (1966).
